# Supplementary material for: A Possible Preventive Role of Physically Active Lifestyle during the SARS-CoV-2 Pandemic; Might Regular Cold-Water Swimming and Exercise Reduce the Symptom Severity of COVID-19?
Source: MDPI journal article supplement (doi:10.3390/ijerph18137158), 2021-07-04
Supplement: s1 [file s1]

**Table S1.** Risk ratios for upper respiratory tract infection by gender.

| Upper respiratory tract infection<br>(frequency/year)                  | Model 1 male         |      | Model 1 female        |      | Model 2 male         |      | Model 2 female       |      |
|------------------------------------------------------------------------|----------------------|------|-----------------------|------|----------------------|------|----------------------|------|
| <1 time                                                                | 0.837 [0.662, 1.058] | 0.07 | 1.1894 [0.931, 1.519] | 0.08 | 1.562 [1.267, 1.927] | 0.00 | 2.172 [1.705, 2.767] | 0.00 |
| 1 time                                                                 | 1.229 [0.935, 1.616] | 0.07 | 1.094 [0.873, 1.370]  | 0.22 | 0.756 [0.548, 1.042] | 0.04 | 0.591 [0.400, 0.873] | 0.01 |
| 2 times                                                                | 1.532 [0.922, 2.547] | 0.05 | 0.708 [0.528, 0.949]  | 0.01 | 0.535 [0.279, 1.026] | 0.03 | 0.474 [0.290, 0.775] | 0.01 |
| >2 times                                                               | 0.500 [0.282, 0.889] | 0.01 | 0.938 [0.579, 1.518]  | 0.40 | 0.168 [0.068, 0.413] | 0.00 | 0.432 [0.181, 1.029] | 0.03 |
| Model 1 physical activity. Model 2 physical activity + winter swimming |                      |      |                       |      |                      |      |                      |      |
